# Supplementary material
Source: PubMed Central journal article supplement (PMC7283970)
Supplement: mmc1.pdf [file mmc1.pdf]

**OMTM, Volume 18**

## **Supplemental Information**

**Airways Expression of SARS-CoV-2 Receptor, ACE2,  
and TMPRSS2 Is Lower in Children Than Adults and  
Increases with Smoking and COPD**

**Narjes Saheb Sharif-Askari, Fatemeh Saheb Sharif-Askari, Mashaal Alabed, Mohamed-Hani Temsah, Saba Al Heialy, Qutayba Hamid, and Rabih Halwani**

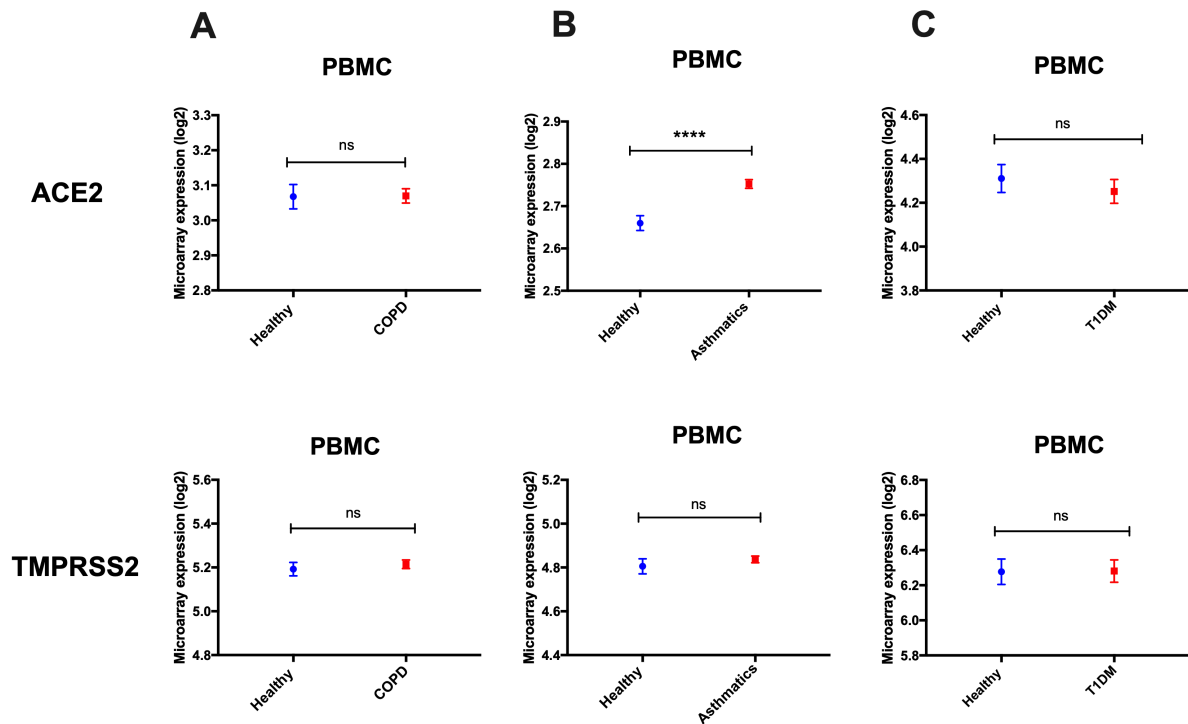

**Figure S1.** Normalized mRNA expression levels of ACE2 and TMPRSS2 genes in PBMCs of different diseases. (A) There was no significant difference in expression levels of ACE2 and TMPRSS2 in PBMCs of chronic obstructive pulmonary disease (COPD) compared to the healthy controls. (B) Comparisons of PBMCs of asthmatic versus control showed that while level of ACE2 was significantly higher in asthmatics there was no difference in PBMCs levels of TMPRSS2. (C) There was no difference in both the levels of ACE2 and TMPRSS2 in PBMCs of type 1 diabetes compared to healthy controls. \*  $P < 0.05$ , \*\*  $P < 0.01$ , \*\*\*  $P < 0.001$ , \*\*\*\*  $P < 0.0001$ .

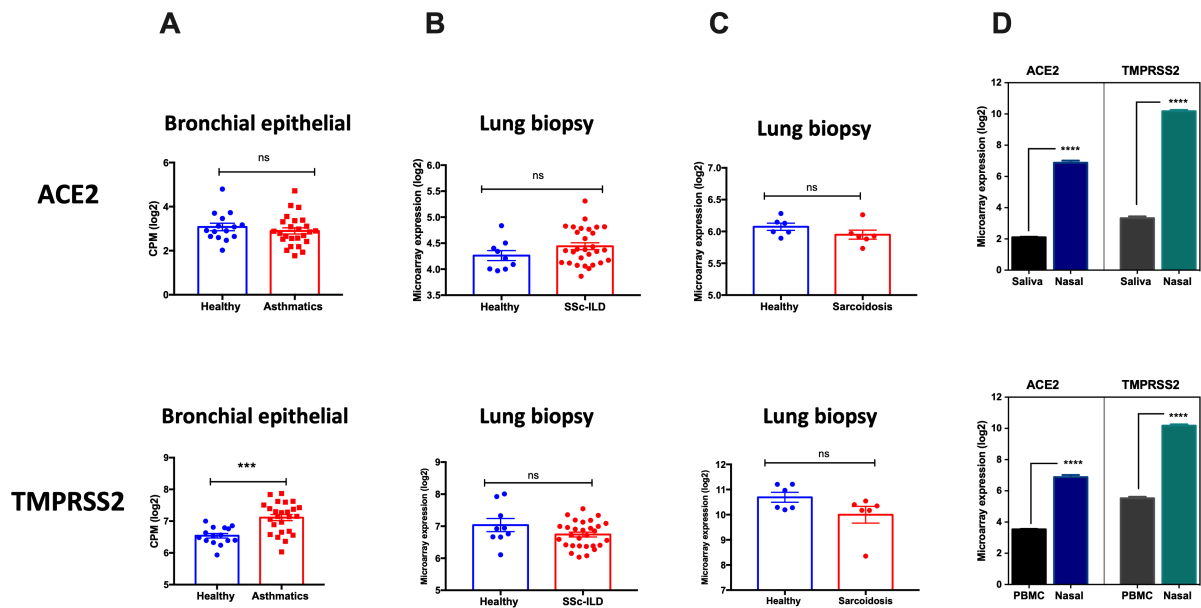

**Figure S2.** Normalized mRNA expression levels of ACE2 and TMPRSS2 genes in PBMCs and respiratory tissues. (A) Expression in counts per million (CPM) of ACE2 and TMPRSS2 genes in bronchial epithelial cells in healthy versus asthmatic children. There was no difference in expression levels of ACE2 between these two groups. (B and C) No difference was detected in levels of ACE2 and TMPRSS2 in biopsies of Scleroderma-associated Interstitial Lung Disease (SSc-ILD) versus healthy controls as well as in comparisons of gene levels in lung biopsies of sarcoidosis versus control. (D) We detected a significant difference in comparison of ACE2 and TMPRSS2 in nasal versus saliva as well as in comparison of nasal versus PBMCs. \*  $P < 0.05$ , \*\*  $P < 0.01$ , \*\*\*  $P < 0.001$ , \*\*\*\*  $P < 0.0001$ .

**Table S1** Gene expression datasets used in this study.

| <b>Groups</b>   | <b>GEO accession</b> | <b>Platform</b> | <b>Cell type</b>                                      | <b>Condition 1</b>                       | <b>Condition 2</b>                                                      |
|-----------------|----------------------|-----------------|-------------------------------------------------------|------------------------------------------|-------------------------------------------------------------------------|
| <b>Children</b> |                      |                 |                                                       |                                          |                                                                         |
|                 | GSE18965             | GPL96           | Bronchial epithelial cells                            | Healthy (n=7)                            | Asthmatic (n=9)                                                         |
|                 | GSE103166            | GPL23961        | Nasal swabs                                           | Healthy (n=21)                           | Asthmatic (n=19)                                                        |
|                 | GSE118761            | GPL11154        | Bronchial epithelial cells                            | Healthy (n=22)                           | Asthmatic (n=32)                                                        |
|                 | GSE19743             | GPL570          | PBMCs                                                 | Healthy (n=34)                           | -                                                                       |
| <b>Adult</b>    |                      |                 |                                                       |                                          |                                                                         |
|                 | GSE56341             | GPL6244         | Small airway epithelial cells                         | Healthy (n=15)                           | -                                                                       |
|                 | GSE41861             | GPL570          | Bronchial epithelial cells<br>Nasal airway epithelium | Healthy Bronchial (n=29)<br>Nasal (n=17) | Asthmatic Bronchial (n=52)                                              |
|                 | GSE30063             | GPL570          | Small airway epithelial cells                         | Healthy (n=11)                           | -                                                                       |
|                 | GSE16008             | GPL5175         | Bronchial epithelial cells<br>Nasal airway epithelium | Healthy Bronchial (n=13)<br>Nasal (n=21) | -                                                                       |
|                 | E-MTAB-1690          | GPL570          | Bronchial biopsy                                      | Healthy (n=14)                           | COPD (n=21) and Smokers (n=27)                                          |
|                 | GSE16538             | GPL570          | Bronchial biopsy                                      | Healthy (n=6)                            | Sarcoidosis (n=6)                                                       |
|                 | GSE24206             | GPL570          | Bronchial biopsy                                      | Healthy (n=6)                            | Idiopathic Pulmonary Fibrosis Early IPH (n=8) and advanced IPH(n=9)     |
|                 | GSE76808             | GPL571          | Bronchial biopsy                                      | Healthy (n=4)                            | Systemic sclerosis (SSc)-related interstitial lung disease (ILD) (n=14) |
|                 | GSE81292             | GPL18991        | Bronchial biopsy                                      | Healthy (n=5)                            | Systemic sclerosis (SSc)-related interstitial lung disease (ILD) (n=15) |
|                 | GSE64951             | GPL570          | Saliva                                                | Healthy (n=63)                           | -                                                                       |
|                 | GSE19743             | GPL570          | PBMCs                                                 | Healthy (n=29)                           | -                                                                       |
|                 | GSE69683             | GPL13158        | PBMCs                                                 | Healthy (n=80)                           | Asthmatic (n=338)                                                       |

|                        |          |        |                                           |                                                                |                                                                    |
|------------------------|----------|--------|-------------------------------------------|----------------------------------------------------------------|--------------------------------------------------------------------|
|                        | GSE70528 | GPL570 | PBMCs                                     |                                                                | Hypertension (n=8)                                                 |
|                        | GSE55098 | GPL570 | PBMCs                                     | Healthy (n=10)                                                 | Type 1 diabetes (n=12)                                             |
|                        | GSE42057 | GPL570 | PBMCs                                     | Healthy (n=42)                                                 | COPD (n=94)                                                        |
| <b><i>In vitro</i></b> |          |        |                                           |                                                                |                                                                    |
|                        | GSE17400 | GPL570 | Human Bronchial Epithelial Cells (Calu-3) | Mock-infected Calu-3 12 hr (n=3), 24 hr (n=3), and 48 hr (n=3) | SARS-CoV-infected Calu-3 12 hr (n=3), 24 hr (n=3), and 48 hr (n=3) |

COPD, Chronic obstructive pulmonary disease; PBMC, peripheral blood mononuclear cell; SARS-CoV, Severe acute respiratory syndrome coronavirus.
